# Supplementary material for: Binding of RNA Aptamers to Membrane Lipid Rafts: Implications for Exosomal miRNAs Transfer from Cancer to Immune Cells
Source: PubMed Central journal article supplement (PMC7697632; doi:10.3390/ijms21228503), 2020-11-12
Supplement: ijms-21-08503-s001.pdf [file ijms-21-08503-s001.pdf]

Table S1. 148 sequences (within the random regions) from sequencing of raft RNA aptamer clones isolated from the selection cycle 7.

35-99 UCAGUUUAUCGCCCCCUAAUGCU  
15-145 GACAUAAUUGGGUGCUGUCGACGUGUUUAAUAAUCGCCUUUUG  
32-96 CCGUUGGCACGCUCGCAGUUGUAGUGCACGUUCAUAAUAGGGUAGC  
A02-37 GCUCGUUGGACUCUAGACGCCGUUAUCCGCCAUUCACUUCCCGCGA  
23-155 UUCAUGUGCUUUUGGGCGCCUUGAGACAAAUUGGUCCUCUUUGACU  
41-22 CUGUAGGACGUGUCUCUUCACCGUACUCACAAGAGCGGAGUGGUACAUA  
54-38 UUGUGGGUUGGCGCACACCAUUCUJGCUCAUUUJCAUCUCUGGAAGUGC  
56-40 UGGCGCAUUGAGCAGUAACCGCAAUCGACUACGCUAUCCCGGGACUGG  
59-43 GAUCCAGAAUCUGCAUGCUUGUAUAACAGUUCUCCUAACUCCCGAGC  
71-55 GUAAACUCCGACUGUAAGAUAUUGCGCGAAUUUGGGUUGCCGGACACUA  
01-21 UACGCGGUGUGCUGUUUCGCGUCCUAUCGACGUGCUUCGUUUCUUCU  
04-60 UCGGAUUUCUCGCCUUCUUAUGCUCUCUGUAAUACGCCACUCCUGAA  
07-64 UGUAGGAUGACGGUCCACCUAAUUAUUCGUGCCCUAAUUCUUCUUGCGU  
09-67 UCAGUUUUUGCGCGACCCUGGCUCUCUGGCCUUUUGUUCGACUUJGCG  
12-70 GGGACAUCUGUUCUGCAAUCAAGGAAAUCUGCUCUCACAGUUCUGGGUC  
23-84a CAGCAACCUCCUGAUACCACUAUUUGGCAGUAGUGGUUUCAGGCCUUUC

53-119 UUUUCCCCUCAUGUAUUCGUAUUGGCCGUUGUCCCUGCUCAUCCCCUGGU  
67-134 AACUGAGCUUGUCUUGUAUUCGUUUGCUUUGAGCGGCCGAUUCUAAGAG  
02-99 UCAGUUUAUCGCCCCCCCUA AUGCUCCAGACAUCGUGAGGAUCAUACUA  
27-159 GCUGCUAGUUGAACAGUCUUAAGCUUGAUCCCUUUCCAAUCAACCUCC  
25-1 CGAUCAGCCACAGUGUUCUGCUAUCGUCUAUCUUAUGCCCCGUAGCCAAG  
26-3 UGCGCUGGGCGGCCGUAUUGUUCUUCUUCUUCUUGCACCCCCGUACAC  
27-4 UCGCUCCGCUGAUCCCGCCGUACGCAGUGUAUCGUUCUACUUGGAUAGCA  
28-5 UGUUUGACCGAGUACGCGUGACUAAGUUCUACUGACCCGUUCCUUGAGC  
29-6 CUGAUUUUCGACCGGCAUUUCUGGCCUGUGUAUUGUUCUAUCCCCUGUU  
30-7 GAUGUUCGCCUCCUUGUGUCGUGUUCUGUGAAUUCGGCUUACCUGGAUCG  
31-8 ACUAGCUAAACCGUCAUGUUCGGCCUGCUUUUUUGACUCAACUUGCCCC  
32-9-TERESA-YARUS\_H04 UCGGCUCGCUCUGGUCGACAACCCCGUCUUGGCCUUCUCUCCAAUAUGCU  
34-11 UAUCCUCGGCUGUUUAGUGUCACUCGCCCCGUCUGUAAUGCCGUCGAGAUG  
35-13 AGUGCUUCUAUGGGUUUGCAGUAAGUUCGUGUCUGGACCUUUCUUUCGU  
36-14 UCAUGUAUUUGGCUCUUCGCUAUGCAUAGUAGUUACUUCCCAGACCAGAC  
37-15 CGAUACGUAAUUCGCACAUAACCGUCUUAUCCUGUUCUCGGUUGUUGGU  
42-23 UCUGGCGCGCACGAAACUUCUUCUUCUUCUUGCUCUCGACCACGCUGAGGA  
44-25 AUGGCUAUUAUGCGUCCUCCUUCUAGCCAUUUAUCGUAUCCUUCGAGUG

45-27 GAUUAGCUGCGAUGAGCUGCUUCGGACUCUGUGGUUAUUUGCCGGUGAUG  
46-29 UUCGGUCUUUUCGCUUGUAUGAUAGUCUUGUGAUGAAGUUGCUUCCCCUU  
47-30 GUGGUUCGACUUGUUCUCUCUUCCCGAUCGUCUAAUCCGGGGAUCAUAUG  
48-31 UUGAAUAGGAUAGUAUCGUGACUCAUCUACUACUAGUACAACGCACUCUG  
49-32 UCUGUCCACUGACUUCCUUGUUCAUGCUCAUCCCUCACUAGAAAUGUCCG  
50-33 AGGUCUAUCGCAGUCUUUCUUCCCCUUCAAGUCACUCUUCUAGUCCAUGGU  
51-34 AGUUGUGUUGACCUAGCGUAUUAACUGGUCGUCUUUGAUAGCGUUGCGU  
52-35 CGGCUCCCCACGUCAUAGCCGUCUUUUGGGUGUUGACCUUCUUAUAGCUG  
57-41 ACGCGCCACCAUCCUCGCUUUGGUUUCGUCUJACCUCUGAAGGUUCCCUG  
60-44 GCCUCUGUAUAUGCACUCUAUGGUCUGAAUCUUAAGCUAGCCACCCUGGGC  
61-45 CGAUCUCCUUGGACAUCCUGUUUGACUGUUACAAUCCCCAAACUCUAGC  
63-47 UGCCGGACACGCGAUUACGUCGUUUGUUCACUUUGCCAUCUAAGGACUAG  
65-49 UCGCUGCGUUAUUCUCCUUGCCGGGAGGCUCUUUCCCCGUUCGUCUUAUG  
66-50 GCAACCGGUAAUUGUAUCUGAGGGGAUUGUCCGUGGGUUGCGUUCUACUCG  
67-51 ACUUGUGAUCUGUCAUUAAGGAUUUGGCCUUAUGAAUUAAGUGUGCCCUAAC  
68-52 CGUGAGGUUUGCAUCGUCGCAGCUUUGUCUUUUACGUUUACGUUCUGGUG  
70-54 CCCCUCGCCCUUCCUUGUACACUAUCCUCCAUUGUACUCCCUUCCUG  
72-56 AGGUGCGGCUUGGAGCGCAUGUCCAGAGCAUCCUUCGCCUAUAGGCCUUG

08-66 CUCUCCUGAUCUCAGACUAUGCGGUGAGCGCGAUCGUUCCAAAGCCUGCG  
10-68 CCUCUCGACUGAAAUAUCUGUAGCUCCGGCACGUUCUGUCUCCUCUGGC  
13-71 CGACCCGAUAGCUGCCCCGAUGUGUUUAUGUCCUUGCGACCCUGCCGAC  
14-73 UCUCAGGGCUAUCUGUGCUCUCGUGGUAAGUACACAGCAACGAAUUGAUG  
15-74 CUCUGGUAUCUGAUGGUCCGGCCCCUUGCCUGUGUUCUGUCUGGACGAU  
16-75 AGUCGCCUCCUGGCCAAACGCUAUGUUGUACCUUUGAUGCUCAGUUGCGC  
18-77 UGCAAGGUCUAGACUCAGUCAUGGAUCUAAUCUGACUUCAGCGCAAACGC  
19-78 UUGCUCUAGUGAUCCACUUGCGUCUAUUGAGCGGCCUUUGCCACGGGUCA  
22-83 AGUAAUAGAGAUUUACUUUCCGUUUUAUUAGGGACAAGCGUCUCCGGU  
23-84b ACCUGUGGCGGGAUUGUUAUCUUUGGUUCUAAAGGUUUUUUCCUGUGGU  
24-86 ACAUGGUGGUGGUCACUUCUACCUUCCCGUCUCGGAAUCGCCUCCUAUG  
25-87 UGUUGAGCUUGCGCGACCUCACAUACCCUGUCAAACACGUCUUCGUGGG  
27-89 CGCCUCACUGUAGUUGGUCGCCCCGCUAGGUCCGAUUGAUCCCUUUGUCU  
28-90 AACGAUUAGUGGAGUUUACCUUCUCAUUUGUCGGGUCACUUCGGCAAGUG  
29-92 GCACGCUAUUACUCCCGGUAGAUGAGUUAUGCUCACUCGUUCUAAAACGC  
31-94-TERESA-YARUS\_G04 GCUAGGCUAACAUUGUGCUCAUGGCCGAGCGUAUGGAUCUACGGACUUA  
33-97 UGCGGAUAGUGGCGUACUAGACGCUUACCGUGAACUCCUACCCACUGAC  
36-100 UCUGCCUCGCUCACCCUGCUCAUGCCCAUAUCCUGUGCUCGACCUACCU

37-102 CCAAUACCAUGGAUUGGUCCCUUUUAUCCAGCUUCUUAACCCUACCUGUU  
38-103 GUUCGGCGUGCCAUAUGUCCAUAUGUAUGGUCGAUAUGGCCUUGCACCUC  
39-104 GUGGUGCUGUGCCUCAAGGUAUGUCAGGCGCUAUGUCUUCGUACCCUAUU  
41-107 UCAGAUUCUCGCCUUCAGGCACGUUGGUA AUGUAGGAAGCUUCCAAUCUG  
42-108 CGAUCCGGAAUUUUGUCCACCGCCUCUCUCUUCUUAUCUGGGCGUCUAGU  
43-109 ACGCGACAGGGUCUGACAGGCGUCUCCUUCUUUUUGCAUAAUCUCCCGU  
44-110 GCGAGUUGCGUAUUGCUUGCUCUUGUUCUCAUUGCCCGUCGCGCUUGGUU  
46-112 UCGUGUUGUGAAUUGCUUUUJAGGCCUCGCAGCGUAAACGGCUUACCCUGU  
47-113 CCUUUGGCUCGGUAUUGAGUCCUAGCCUUCUCCAUGGUUUUUUCCCUUC  
48-114 UGCUUUUGCCUGUCAUGCCUACUGCACUUCGAUCA AUGCCUUCCUCGUA  
49-115 CUCCUUGUUCUGUGUACUGGUUGACUUUCGUCGGUGUCUGCGUCCGAGGG  
50-116 UGCCAGACGGCGCACUCUCCAGCUAUUGACGUUGAUCAUUCGCCACGCAU  
51-117 UCUACGGCUUUUGUUUCAUCGUUGCGUUCUCUGUCGACACUGAGUGCCUA  
54-120 AUCCGAUGUUCGGGAUCUCGAUUACUCUGUCAUCUCGGCAGUCCGCUGU  
55-121 GUAUUCGCAUGUGUGUGAUCAGGUCAUUAUGUUUGUCCUGUGGAUGUAAC  
57-123 AAAUGCAAUUCGUAGUGGUCGAGAUGAAUCGUUUGUCAAGUUACCCUCCG  
58-124 ACCGAAAUUAGUGUGCAUCCUCCUCUACGUUCAUCGAUCUCCUUGCGU  
59-125 UCUGGGUCUGUCUACUCGAUCACGUGCGCGUGGAAGUAGGUGUAUAUCAG

60-126 CCCAGGAAUUGUGUUUUGACUAGCGCCCGUUCUCAUGUUGUGUGGGUGUG  
61-127 CUAUGCACUCGAUGCCGUAUGCGAACUGCUAACUGUUUUUUAUUCGCAU  
62-128 AUUCUUCCCCGGCACCUACUCGUCUACAUCUUGCCAUCGGGCCCCCUUGGA  
64-131 GCUCAGUUGGGUAGUAUUGUAUUGGCUGUAUCCUACCGCGUCCAGAAUGA  
65-132 ACUUCUAAUAGGGUGCAUGUUAUUUGUGCUCAUACCUCAAUACCCUGCU  
66-133 UCGUAAACUACGUUGGACUGCAUUCGAAAUUGUCUAUAUGCGCCUACU  
04-111 CUAUCAGAAUAUGUGUUCUUUGGUUCUGUGCACACGCUGUUUCAGGGCU  
05-135 CAGAUUGGGCCAUCUGUCAUAGUGAUUCUUCUUCCCAGGUAUCCACUCUA  
06-136 GCAAUCAUUUGCGUCUCUUUGCUGUUGCUUAUGUGUUCGCCGCUUAAGG  
08-138 GUUCUGGAUCUCUAGCCUUUCCCCUCUGAAUCCUCCUUUCGCAACGCG  
09-139 GCUCCGGUACUAGAAUAGUGUUCUUGUGCUUGUUUCUCUACCUCGACUCA  
11-141 UCUGCGGUCUGACGUAUCAAGAAGUAUGGACCCUGAGUAUUUAUCUGCA  
12-142 UUUUGCGAACGAGCUUCAUGCCCUUUGAAGACUGCCUGUGUUCUCCUC  
13-143 GGCCUCUGCUAAGACCACUGCGUUGCAACACAUCCUGAUCCACCUCAA  
14-144 UAUCCGGGCGUACGAUUCGCAUGAGAGUUCUCCUGUAAUUUACGGCCUGGU  
16-146 AUGUGAGGAGUCGCGGUUUCUUCUGGUUUUGGUCCAUJGGCCGAGUCAA  
18-149 UCGCUCAUCACUCUCCCUACUCGUCUGUAUUCUGUCCUUGACCCCGAUG  
19-151 UCUGUCUUCUUCGCUCUGACGCGAUUUUUCCGUGCGAUUUUGCGUCUUUGU

22-154 UGGUUUAGCAUCGUGGCUACUAAACCGUCGCAUCCAUCUGCCUUCGCG  
24-156 UGCCCACAUUGACGACCUCCAGACCGUGAUGGCACCCGUGGAUACCUCGA  
25-157 UGUACCAUGGCAUAUCAGCUCACAUUCUUCUGCGCCUCCUCCCCUGCU  
26-158 GCUAUUCGGAUACGCAUCGUGUCCACCGCCGAGUCAUCGGUCGGCGCGCG  
28-160 GCGGAGUGCUUUUCCUCGUCCACUGCGUUUUGUCAAAAGGUUCACUGAGUC  
29-161 CAGAGCUUCGGUCAUCAUCGCGCUGGGUCCAUAAGGCCGAUAUACAGAG  
30-162 UCUCGGCUUAUCGCGUUAACCGUUGUGAGUAUAGCUCCUCAAACCGUCUUG  
31-163 GCAUUUUAAGCGUGAAUUCUUCGCGUUUUCGUCGGGCUAUUCCUGCCUC  
33-165 UAGACUCGUCGAUUGGCCAUCGAUGGUCACUGCUCGGAGAUUGUUAGGGC  
34-166 UAAACCAUAGGCACCUCGUUUGGAUGGAUACACGUUUCAGCCCCUGAUG  
35-167 AUCGCAGUUCAGUUCUCAUCGCCUUGGUCCUAGUACUCCGACCCUGCUG  
03-59 GCGCUAUUCCCCUCUGGCGUUCGUCUCAACGUCUGGCCAAGACCCGAUAUA  
56-122 GGCUGUGGCUUCCGUCCUCAGGCGAUUUGUCUCGUGUUGCUUGACUAGGUUGGU  
07-137 UGUUCUGUGGAUGGUCAUAUUGUAUCGUUCCCUGAUCUGUGCUCCCGUACUGCCAACUGUCCUACGCC  
53-3 UCGUGCGCUUCUUCUCUCUACCUUAUCGACUCUCCUAUACCCACUCACGUCCUGUGACUUCCCACACUG  
26-88 CGCUGCUGGUCAGUUCGUAUCACUGUUCGCCUAUCCGCCGUUCUCUGACUGUUGUUUGGUUUAGCGAG  
38-17 CCGUGGCACUCUUGUGUCUGUUGUGCCCUUGUAGUUGUUCGUCAUGUUUCCGCCGUCACUCCCGUCGUU  
39-19 CCGCCCUUGCUCGUUUCGGAUCCCUCCAUUCUUGCUGAAGUCGUCCUAUCGCUCAUCCAUCCUCAUGUU

40-20 GCCCGUAAUGUGGGUUGGUUCUCUACGUUCAACGCUCGUUUCUACUCGUAUCCACAAUCUAACCCUGCC  
43-24 CGCACUUAUAUGGCCCGUGUGGUUGCGAACCUUCCCUUCCCCUGUGUCAUGAUGAGAUCCGGUCUUCUGG  
55-39 AGUGCUUCAUGUAUUCUGGCGCUAUGCUCUAUCGUGUGCUUGCUCUCCUGCGCGAUUUCUCCUCCCGU  
58-42 GGGCCGUGCUCAUCCAACGUCGCCGAACGGGCUCGAUUGACCCCAUGCCGCCGAAACGCUAUCCUCGACU  
62-46 CUGACGAGAGCUAGCCUUUUUGUCACCGAACUUGCUUCUCGGAGGUUCCCUUGAUCUGAUUUCUCCCCU  
64-48 CUUGUCAUGACCCCGUGUUUGUUAUCUCCGCUCUUUUAUCUCAUAGUUUGUUCUACGACUCGCUCUCU  
69-53 UUGCGGCUAUCGUUUCGUCUUUCCCGUACGUGGUUCUAUACCCCCAGGACUCAUCCUCUCCCGUUUC  
05-61 UAGGUAUGGUUUGUGUCCCUCCUACCUAGCUCUAUGAUGUGGCCUAUUCGUCGUAGCACGCUGUGGCUU  
06-62 GCGUGUCGUGAUUCAUUCUUGUUUCCCCCUCGUGUCGUAUCGAGGUGCGUAUCGAUCGCUUACGCCCCC  
17-76 CCUGUCUGGUGUUUCGGUCUAAUUACGUGGCUGGAUUAGUUAACCCGAGAUGUCCGAAUCCUUGGUAUG  
20-79 CGUGCUACGUGUCUCAGCACGUAUCCUGUCAAGUAUCAUGAUCCGUGCCCUCAGCGUCCUCUGACAUCAC  
21-82 UCGAUGCCGCCUCUUCUCGUGUUCACUUUCGUGCCGACGCAAGCAACACUUCUCUUUCGGCCCUGGUCUC  
30-93 UCCGUCAAGGCGCGUUGCAAUCCCGAGGUCUGUAUUUUCUUCGUUAGUCCUGCACAUUCUCCUCGAAC  
34-98 GUAACUGAAUUGACCGGCACUAACCGCUUCCUACGACUCUAUUAUUGCUGAUUUUUUGGCUAACCUGCAC  
40-106 UCCUAACAUUGGCAGCGUUUUAGGUUCAUCGGUJCAUUAAGCCUUCCCUUAGCUUCGUCGCUACACGUUU  
52-118 UUUGCCGGCCUCUGAUUAAGCUAUCCACUCACUAUACAACGCAAUUCGCGUUGUCUGUUUUGUUCGGUU  
63-129 AGAGUUGCAAUUGACUUAUCCGGUCGCUUUUGAACUACUUGAUCCUUUGGAUUAUGCCUAUCCCGUGU  
68-10 GUGAAAGGAGUCGUACUUCUCUUCGUGUGUGGCCUCGUCUUCUUCUCCCGUUUGUCUCCCUUUCGCU



01-69 GCCAUCGGCGUAUACCGGGGCAUUUCUGGCACACACUUAGAGUCAGUGCGUGCCUUGGGACACCCCACUG  
10-140 UCGUUUUUAUCUCCUCCUUUGAUCUJCCUCCCAAUUUGCUACUGAUCCAGCCCGUUGGCUGUCCCAGCUUG  
17-148 GCAAAGUGUAUGCGGAUCUUUGCUCGCAGUCAUUCAUCAUCUCCUAUCUGGUUGUUUCGUCCUACUGUCU  
20-152 UCACCUCAUCGCCCACGAAGAAUUGCGCCGAUCUCGGAUGGCUAUGGUUCGCAACGUGCGUUAACAGAAG  
21-153 AGUAGCCUGUGUCUUUUAGCCCUUUAGUACUACUCAACUUGUUCUCUUGCCUUUUGUUAUCUUUCCUCCU  
32-164 UCAGCCUACCGUAUUUUGUCUAGUGUUCAUACUAAUACGACUCCAGAACGGUCAUGAUCACGGGUCUUGU
